# Supplementary material for: Bronchial epithelial innate and adaptive immunity signals are induced by polycyclic aromatic hydrocarbons
Source: Royal Society of Chemistry journal article supplement (doi:10.1039/c5tx00389j), 2016-01-01
Supplement: c5tx00389j1.pdf [file c5tx00389j1.pdf]

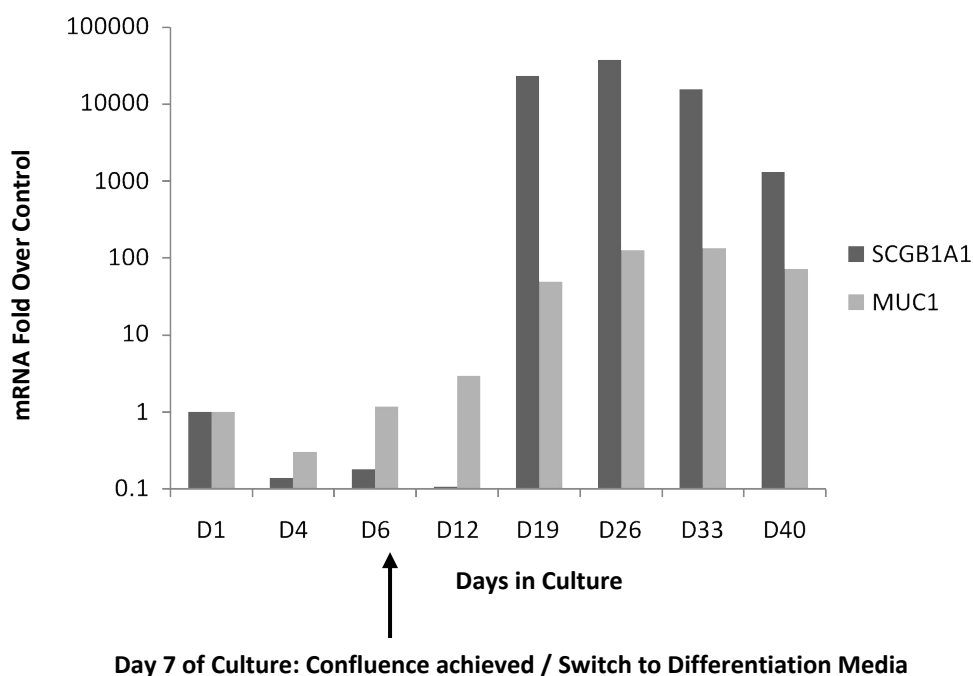

**Supplementary Figure 1: Characterisation of Differentiated human primary bronchial epithelial cells**

HPBECs from 5 individual donors were plated onto 24 well plates and cultured until confluency using epithelix proprietary growth medium. When confluency was reached (Day 7) cells were switched to differentiation media and maintained for up to 40 days (D1 - D40). Cells were then analysed for airway epithelial differentiation marker (SCGB1A1 and MUC1) gene expression using real time PCR. Results were normalised and expressed as fold over Day 1 (D1) expression. Values indicated are mean +/- SEM.
